# Supplementary material for: Pharmacological targeting of apelin impairs glioblastoma growth
Source: PubMed Central journal article supplement (PMC5841205; doi:10.1093/brain/awx253), 2017-10-03
Supplement: brain-2017-00147-file009_awx253.pdf [file brain-2017-00147-file009_awx253.pdf]

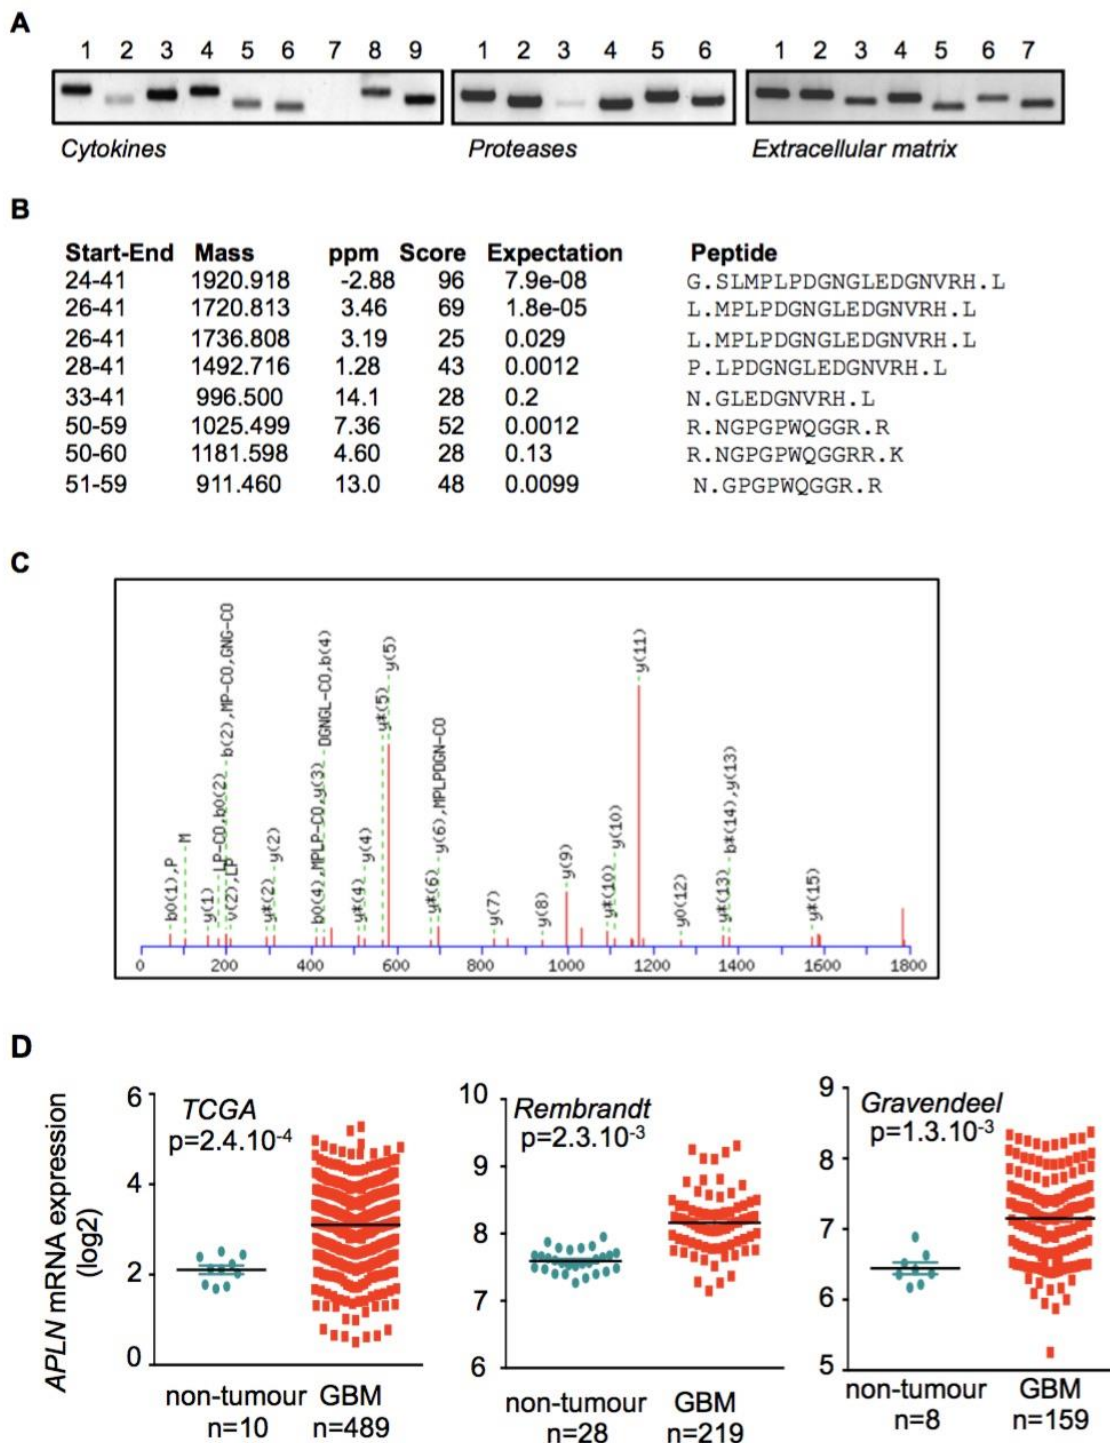

**Figure S1. Apelin production by brain endothelial cells.** (A) RT-PCR was used to check for the presence of the mRNA corresponding to the hits identified in the MS screen. Cytokines: 1. *ADM*, 2. *APLN*, 3. *CTGF*, 4. *FSTL1*, 5. *PTX3*, 6. *IGFBP7*, 7. *MIF*, 8. *TGFB2*, 9. *LGALS1*; Proteases: 1. *CST3*, 2. *SERPINE1*, 3. *TIMP1*, 4. *PRSS23*, 5. *CTSB*, 6. *SRGN*; Extracellular matrix: 1. *LGALS3BP*, 2. *FN1*, 3. *THBS1*, 4. *EFEMP1*, 5. *HSPG2*, 6. *LAMA5*, 7. *EDIL3*. (B) Peptide sequences corresponding to apelin found in MS are indicated. Mass: observed mass; ppm: parts per million; Expectation: number of matches with equal or better scores that are expected to occur by chance alone. (C) Peptide View. MS/MS fragmentation of **SLMPLPDGNGLEDGNVRH** sequence. (D) *APLN* mRNA expression in non-tumour and glioblastoma tissue using the TCGA, Rembrandt and Gravendeel databases. Data were analysed via the Gliovis platform (<https://gliovis.shinyapps.io/GlioVis/>).

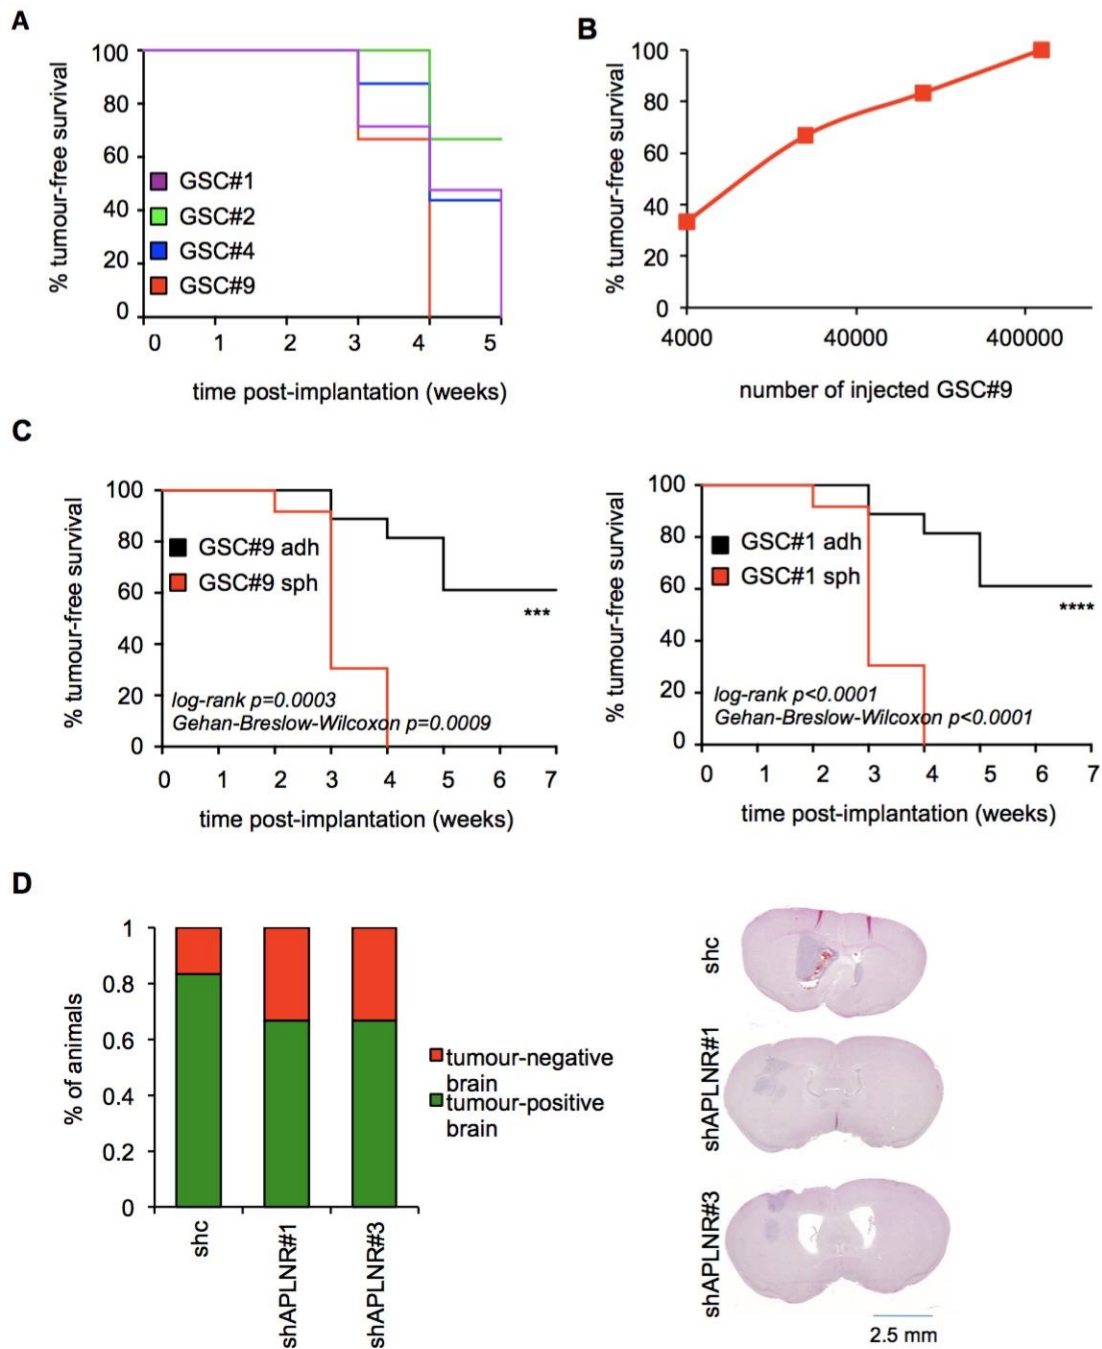

**Figure S2. *In vivo* characterisation of patient-derived glioblastoma cells with stem properties (GSC).** (A)  $5.10^5$  patient-derived Glioblastoma cells with stem properties (GSCs #1, #2, #4 and #9) were implanted in flanks of nude mice and number of non-regressing palpable tumours was scored over time.  $n=4$ . (B) Different amount of GSC#9 were implanted in flanks of nude mice and number of non-regressing palpable tumours was scored at week5.  $n=6$ . (C)  $5.10^5$  GSC#9 and GSC#1 cultured either as sphere (sph.) or adherent (adh.) were implanted in flanks of nude mice and number of non-regressing palpable tumours was scored over time.  $n=6$ . (D) GSCs#9 were infected with control shRNA (shc), and shRNA targeting APLNR (sequence #1 and sequence #2,) and  $10^5$  were implanted in female nude mice. Animals were sacrificed at week 5 post-surgery and the presence of tumours was determined by HE staining (absence, red; presence, green on the graph).  $n \geq 5$  mice/group. All panels are representative of  $n=3$ , unless specified.

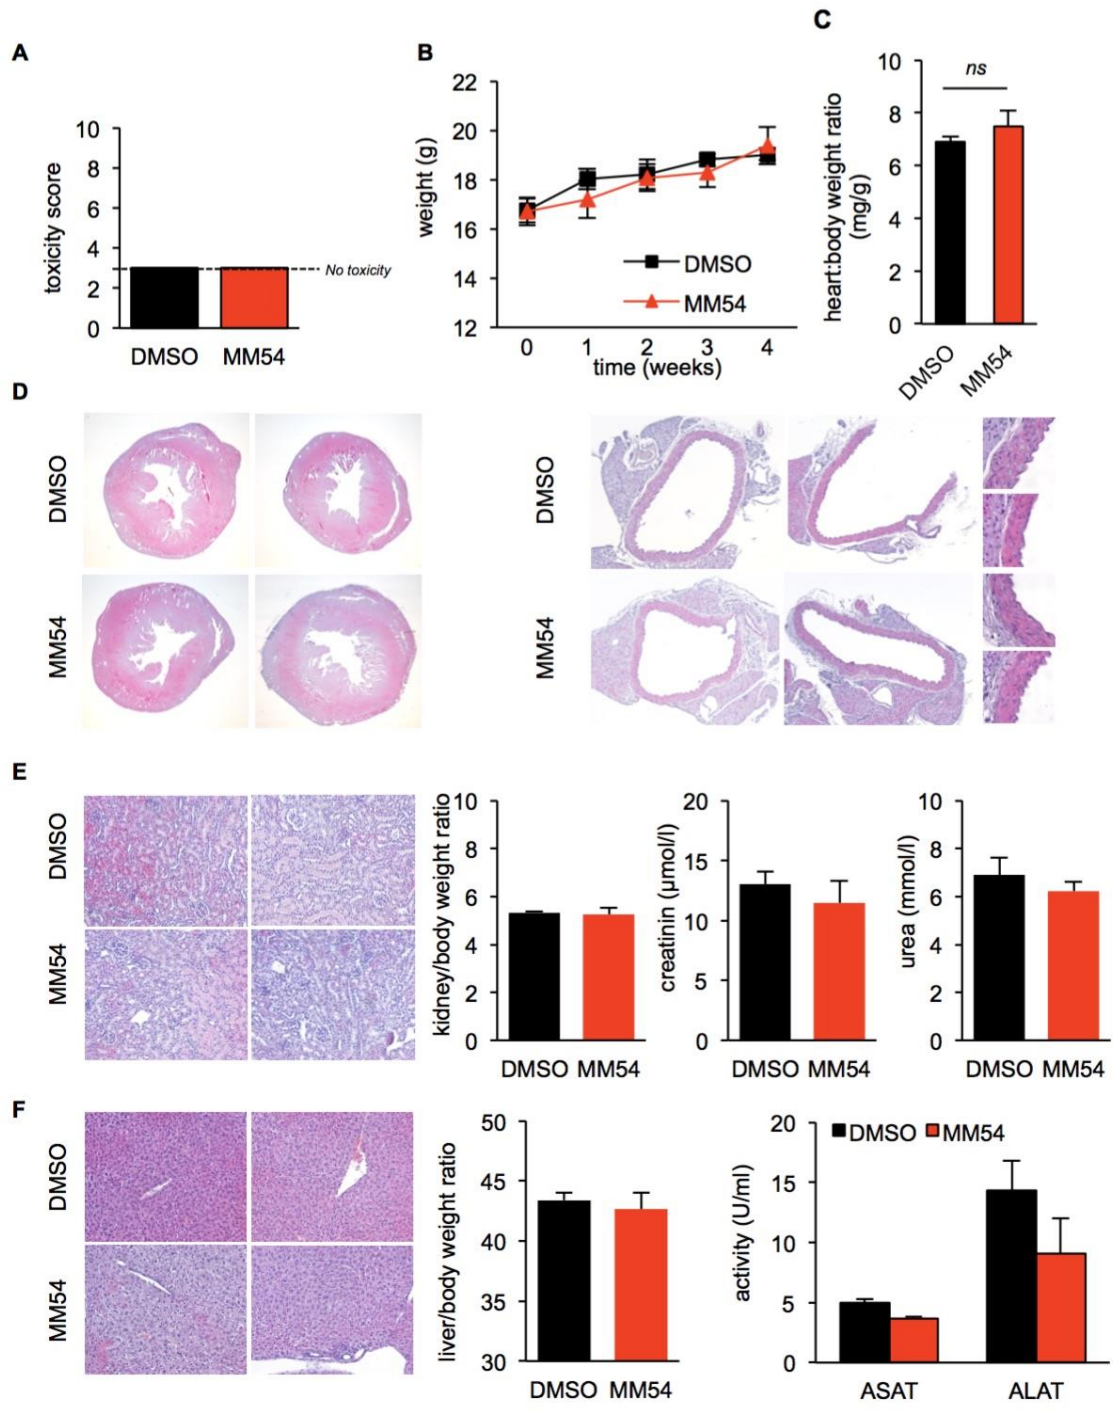

**Figure S3. Pre-tolerance studies of MM54 in healthy mice.** (A) C57Bl/6 mice were injected twice a week with MM54 and monitored for toxicity. (B) weight loss, (C) cardiac, (D) kidney and (E) liver function. n=4 mice/group, mean±SEM.

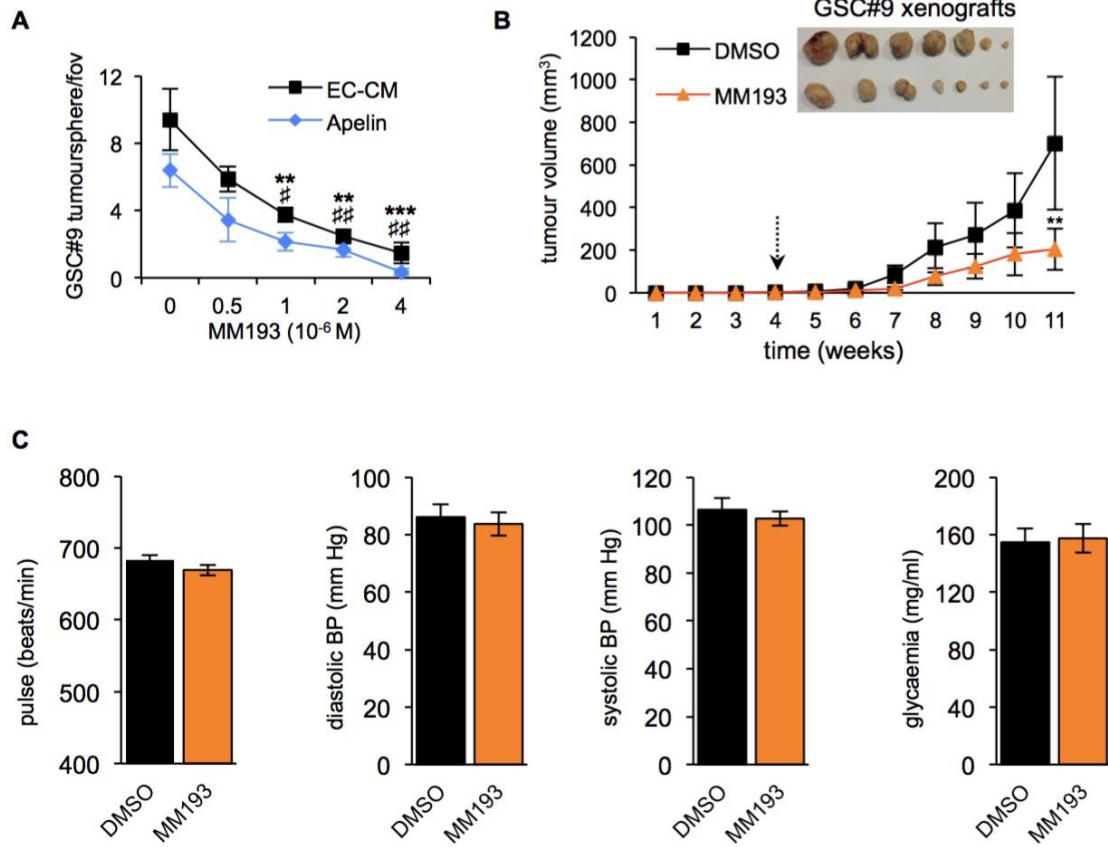

**Figure S4. Efficacy of the APLNR antagonist MM193 in reducing xenograft progression.** (A) Efficacy of the APLNR antagonist MM193 in reducing GSC#9 TS formation in response to increasing doses of the MM54 brother compound MM193 in endothelial cell conditioned medium (EC-CM) and apelin-supplemented mitogen-free media. n=3 mean±SEM. \*\*p<0.01; \*\*\*p<0.001. (B) Nude mice were inoculated with GSC#9 and monitored for tumour growth following treatment with MM193. n=6 mice/group, mean±SEM. \*\*p<0.01. (C) Analysis of cardiac frequency, blood pressure and glycaemic index in response to MM193 treatment in healthy C57Bl/6 mice. n=4 mice/group, mean±SEM.
